# Supplementary material for: An innovative hybrid biosorbent composed of nano ZnO and marine macro algaeJania rubensembedded in an alginate/PVA matrix: insights into Pb2+removal in water
Source: Royal Society of Chemistry journal article supplement (doi:10.1039/d2nj04896e), 2022-11-22
Supplement: d2nj04896e1.pdf [file d2nj04896e1.pdf]

ARTICLE

## Innovative hybrid biosorbent composed of nano ZnO and marine macro algae *Jania rubens* embedded in alginate/PVA matrix: Insights into Pb<sup>2+</sup> removal in water

Kadimpati Kishore Kumar,<sup>\*a,c</sup> Sanneboina Sujatha,<sup>b</sup> Wojciech Skarka,<sup>d</sup> and Olivier Monfort<sup>\*e</sup>

<sup>a.</sup> Department of Pharmaceutical Bio-Technology, Mallareddy College of Pharmacy, Osmania University, 500 100 Secunderabad, Telangana, India.

<sup>b.</sup> Department of Pharmaceutics, Narayana Pharmacy College, JNT University, Ananthapuramu, 524 002 Nellore, Andhra Pradesh, India.

<sup>c.</sup> Department of Environmental Biotechnology, Faculty of Power and Environmental Engineering, Akademicka 2, Silesian University of Technology, 44 100 Gliwice, Poland.

<sup>d.</sup> Department of Fundamental of Machine Design, Faculty of Mechanical Engineering, Konarskiego 18A, Silesian University of Technology, 44 100 Gliwice, Poland.

<sup>e.</sup> Department of Inorganic Chemistry, Faculty of Natural Sciences, Comenius University Bratislava, Illkovicova 6, Mlynska Dolina, 842 15 Bratislava, Slovakia.

### Electronic Supplementary Information (ESI)

**Table S1.** Comparison of maximum metal uptake ( $q_m$ ) for Pb<sup>2+</sup> removal using different biosorbents.

| Biosorbent                          | pH  | $q_m$ (mg g <sup>-1</sup> ) | Ref.          |
|-------------------------------------|-----|-----------------------------|---------------|
| Fe <sub>3</sub> O <sub>4</sub> MNPs | 5   | 30                          | [46]          |
| <i>Gracilaria changii</i>           | 4.5 | 38.52                       | [32]          |
| <i>Ulva lactuca</i>                 | 5   | 54.3                        | [48]          |
| <i>C. fastigiata</i>                | 5   | 16.11                       | [36]          |
| <i>S. glucescens</i>                | 5.5 | 35.53                       | [44]          |
| <i>C. indica</i>                    | 5.5 | 33.77                       | [44]          |
| <i>P. capillacea</i>                | 5   | 34.1                        | [37]          |
| <i>J. rubens</i>                    | 5   | 30.6                        | [37]          |
| <i>J. rubens</i> -PVA-SA            | 5   | 71.43                       | [4]           |
| Magnetic alginate beads             | 7   | 50                          | [49]          |
| ZnO-JR-PVA-SA                       | 5   | 111.11                      | Present study |

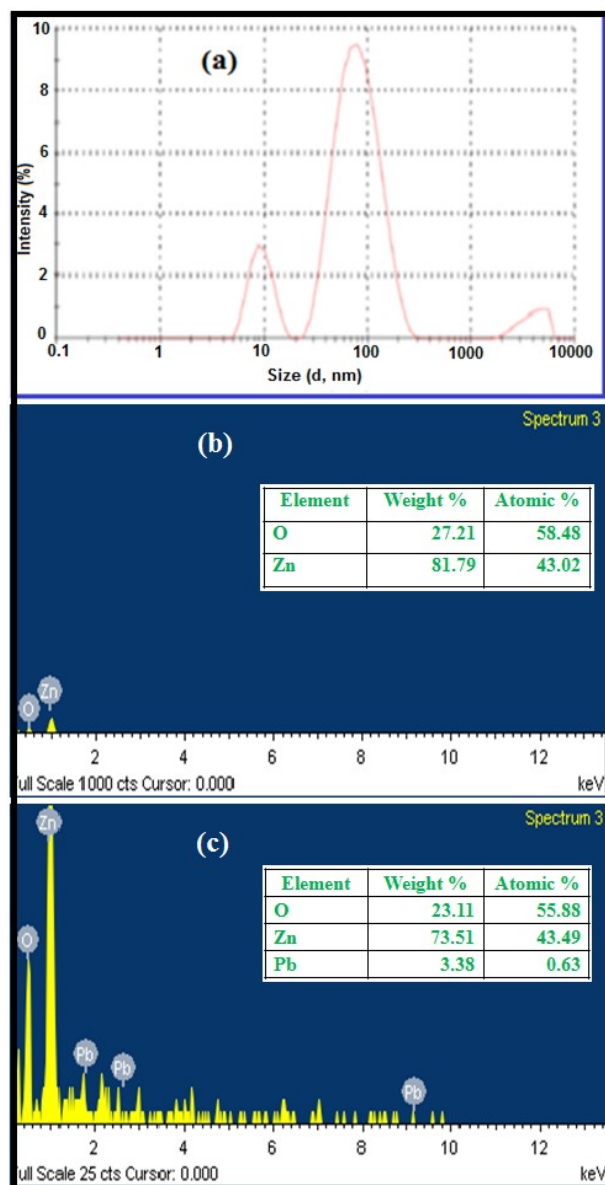

**Figure S1.** (a) Particle size distribution evaluated by DLS, and (b) EDX analysis of the hybrid biosorbent loaded with  $Pb^{2+}$ .

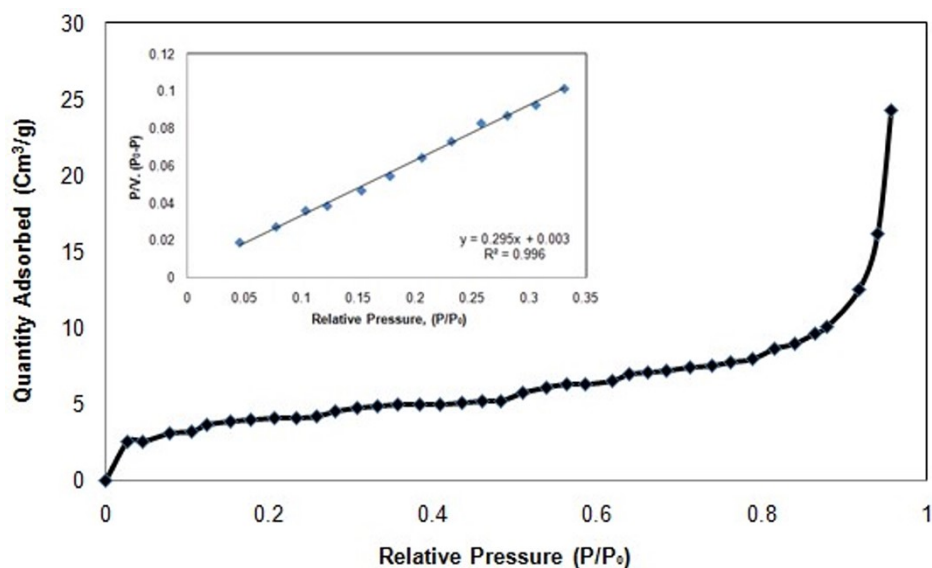

**Figure S2.** BET isotherm for evaluating the specific surface area of ZnO nanoparticles.

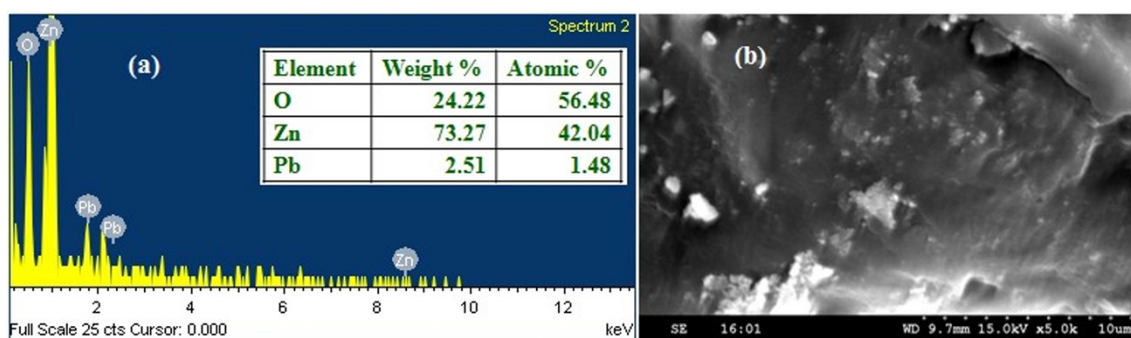

**Figure S3.** (a) EDX and (b) SEM images of hybrid biosorbent after 4 regeneration cycles.

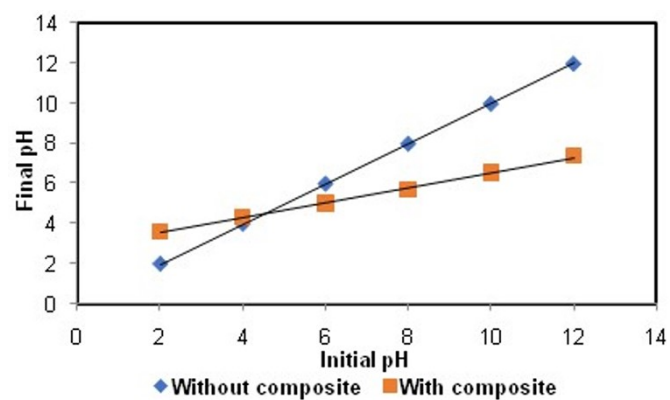

**Figure S4.** Measurement of PZC of ZnO nanoparticle using the pH drift method.
